# Supplementary material for: Lipidome profiling with Raman microspectroscopy identifies macrophage response to surface topographies of implant materials
Source: PubMed Central journal article supplement — Proc Natl Acad Sci U S A. 2021 Dec 21;118(52):e2113694118. doi: 10.1073/pnas.2113694118 (PMC8719892; doi:10.1073/pnas.2113694118), 2021-12-21
Supplement: pnas.2113694118.sapp.pdf [file pnas.2113694118.sapp.pdf]

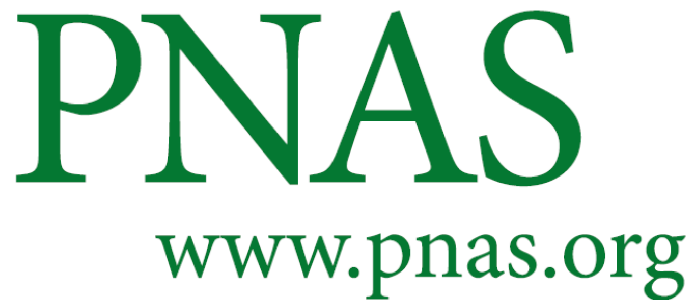

## Supporting Information

Lipidome profiling with Raman microspectroscopy identifies macrophage response to surface topographies of implant materials

Nora Feuerer<sup>a,b</sup>, Julia Marzi<sup>a,b,c</sup>, Eva M. Brauchle<sup>a,b,c</sup>, Daniel A. Carvajal Berrio<sup>b,c</sup>, Florian Billing<sup>a</sup>, Martin Weiss<sup>a,d</sup>, Meike Jakobi<sup>a</sup>, Nicole Schneiderhan-Marra<sup>a</sup>, Christopher Shipp<sup>a</sup>, Katja Schenke-Layland<sup>a,b,c,e</sup>

<sup>a</sup> *NMI Natural and Medical Sciences Institute at the University of Tübingen, Reutlingen, Germany*

<sup>b</sup> *Institute of Biomedical Engineering, Department for Medical Technologies and Regenerative Medicine, Eberhard Karls University Tübingen, Germany*

<sup>c</sup> *Cluster of Excellence iFIT (EXC 2180) "Image-Guided and Functionally Instructed Tumor Therapies", Eberhard Karls University Tübingen, Germany*

<sup>d</sup> *Department of Women's Health, Research Institute for Women's Health, Eberhard Karls University Tübingen, Germany*

<sup>e</sup> *Department of Medicine/Cardiology, University of California Los Angeles, Los Angeles/CA, USA*

Corresponding Author: Katja Schenke-Layland

Email: [katja.schenke-layland@uni-tuebingen.de](mailto:katja.schenke-layland@uni-tuebingen.de)

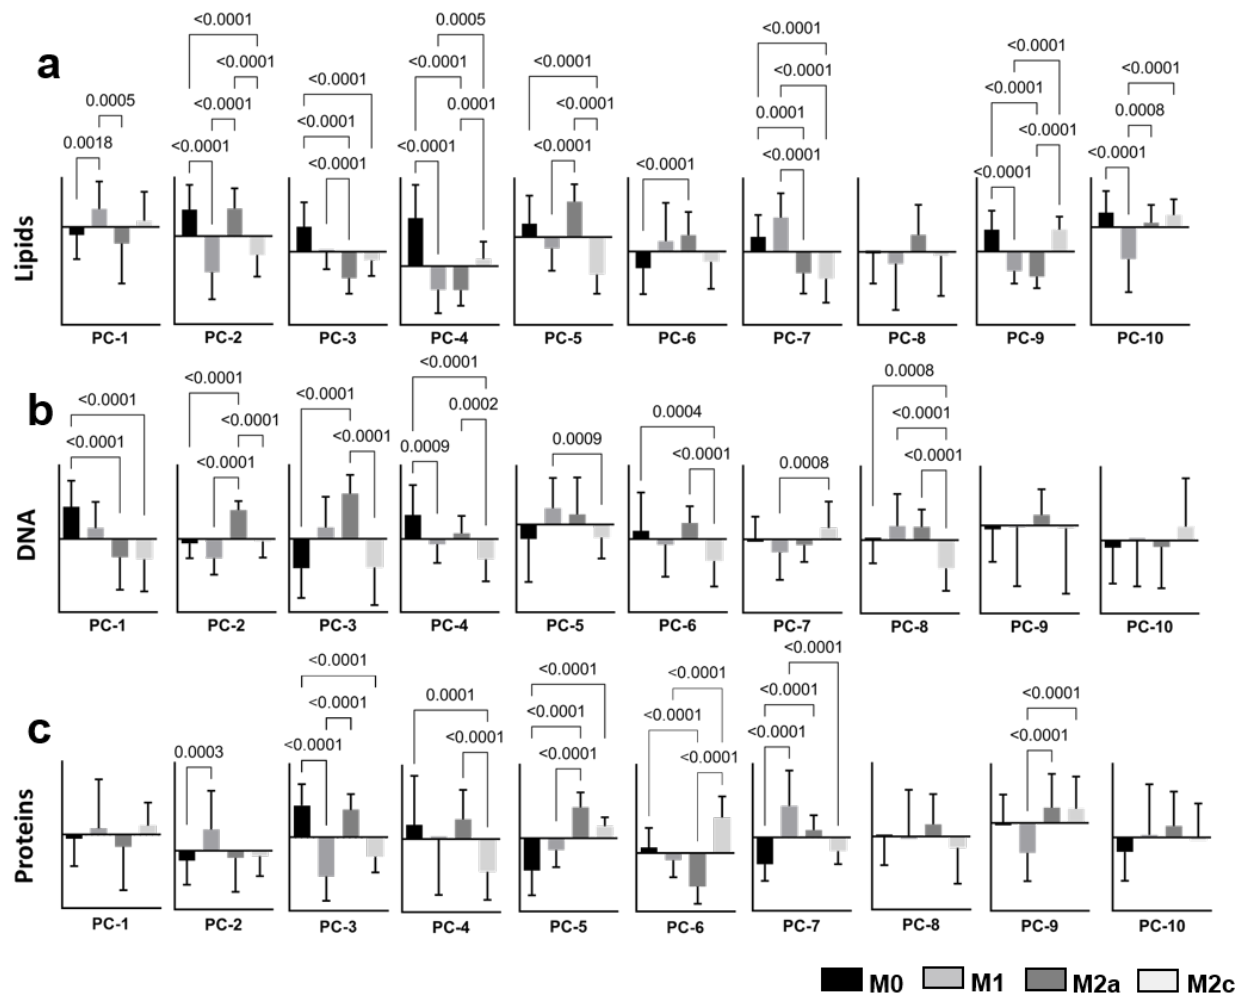

**Supporting Figure 1. Analysis of PCA scores of major cell components helps identifying optimal separation of MDM subtypes.** First 10 principal components of (a) lipids, (b) nucleic acids, and (c) proteins were analyzed for significance using Kruskal-Wallis + Dunn's post hoc test. Scores are plotted as mean  $\pm$  SD. Each subtype contains data of 30 cells from each donor (total of 180 cells).

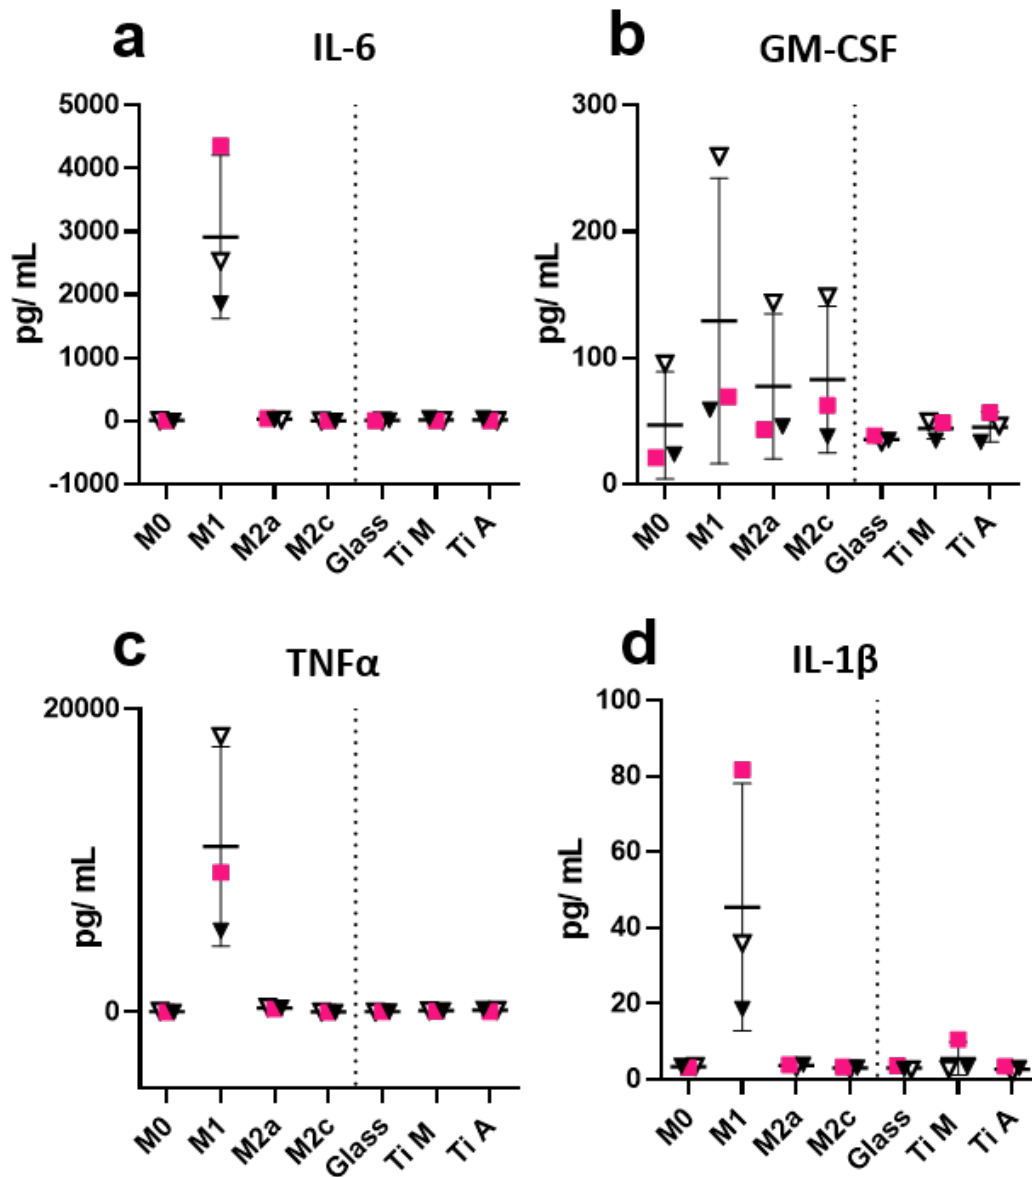

**Supporting Figure 2. Expression of inflammation-associated cytokines is not increased on glass and titanium.** To assess activation status of MDMs cultured on biomaterial surfaces, inflammation-associated cytokines were analyzed by multiplex bead immuno-sandwich assay. IL-6 (a), GM-CSF (b), TNFα (c), and IL-1β (d) did not show increased expression compared to M0 MDMs.

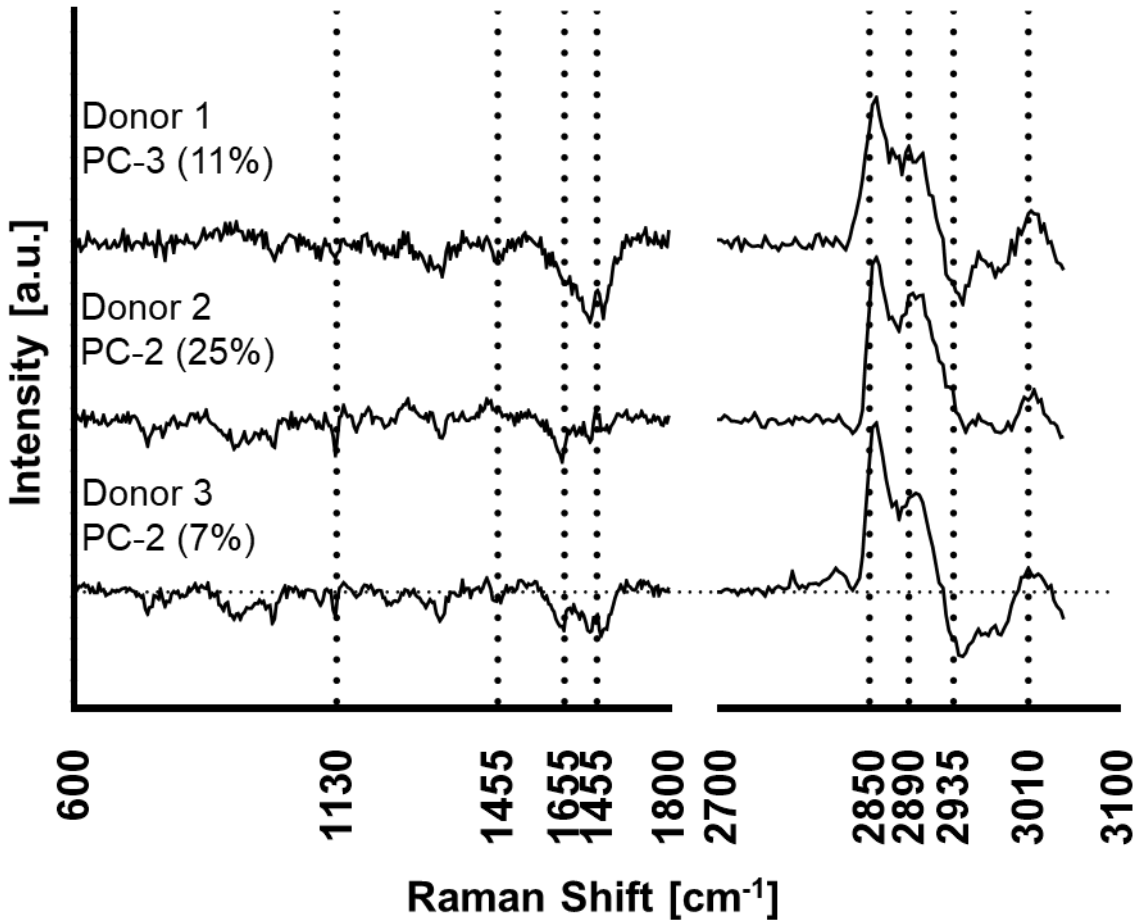

**Supporting Figure 3. Loadings plots indicate comparable biochemical changes occurring in all donors in MDMs adherent to biomaterials.** To assess if Raman spectral information can be used to identify MDM polarization in individual donors, direction vectors that define the multivariate model need to be compared. Here, the original variables have comparable loadings, indicating that separation is based on similar biochemical changes within the cell.

**Supporting Table 1. Raman peaks of MDM components and their associated molecular assignments.**

| <b>Peak [<math>\text{cm}^{-1}</math>]</b> | <b>Molecular Assignment</b>                                     | <b>Component</b> | <b>Reference</b> |
|-------------------------------------------|-----------------------------------------------------------------|------------------|------------------|
| 748                                       | Ring breathing vibrations of nucleic acids and tryptophan       | DNA              | [7, 8]           |
| 923                                       | C-H stretch of proline                                          | Proteins         | [9]              |
| 935                                       | A-helix                                                         | Protein          | [4, 8]           |
| 1005                                      | Symmetric ring breathing of Phenylalanin (Phe)                  | Protein          | [4, 8]           |
| 1100                                      | $\text{PO}_2^-$                                                 | DNA              | [2, 8]           |
| 1127                                      | C-N stretching                                                  | Proteins         |                  |
| 1235                                      | extended Amide III, peptide backbone                            | Proteins         | [4]              |
| 1270                                      | $=\text{CH}_2$ , C=C in USFA                                    | Lipids           | [9]              |
| 1310                                      | $\text{CH}_3\text{CH}_2$ twisting mode                          | Lipids           | [8]              |
| 1340                                      | Adenin                                                          | DNA              | [4]              |
| 1350                                      | Thymine, Adenine, Guanine                                       | DNA              | [4]              |
| 1440                                      | $\text{CH}_3/\text{CH}_2$ scissoring, $\text{CH}_2$ deformation | Lipids           | [8, 9]           |
| 1450                                      | $\text{CH}_2$ bending                                           | Proteins         | [9]              |
| 1585                                      | C=C olefinic stretch                                            | Proteins         | [9]              |
| 1655                                      | C=C lipid stretch                                               | Lipids           | [4, 8]           |
| 2850 - 2855                               | $=\text{CH}_2$ , symmetric stretching                           | Lipids           | [9]              |
| 2886 - 2895                               | $=\text{CH}_2$ , asymmetric stretching                          | Lipids           | [9]              |
| 2920 - 2935                               | $=\text{CH}_3$ , symmetric stretching                           | Lipids           | [9]              |
| 2950                                      | $=\text{CH}_3$ , asymmetric stretching                          | Lipids           | [9]              |
| 2980                                      | CH stretching                                                   | Lipids           | [9]              |
| 3005 - 3020                               | $=\text{CH}$ stretching of USFA                                 | Lipids           | [9]              |
